# Supplementary material for: Photoresponsive peptoid oligomers bearing azobenzene side chains
Source: Royal Society of Chemistry journal article supplement (doi:10.1039/b804802a), 2008-01-01
Supplement: b804802a.pdf [file b804802a.pdf]

Supplementary Information  
for  
**Photoresponsive Peptoid Oligomers  
Bearing Azobenzene Side Chains**

Neel H. Shah and Kent Kirshenbaum\*

*Department of Chemistry, New York University, 100 Washington Square East, New York, NY 10003-6688, USA. E-mail: [kent@nyu.edu](mailto:kent@nyu.edu); Fax: +1 212 260 7905; Tel: +1 212 998 8487*

**TABLE OF CONTENTS:**

|                                                              |       |
|--------------------------------------------------------------|-------|
| Synthesis of peptoid oligomers                               | S2    |
| Structures of peptoid oligomers                              | S2-S3 |
| Characterization of peptoid oligomers                        | S3-S7 |
| Characterization of <b>14</b>                                | S7    |
| Photoisomerization of <b>1</b>                               | S8    |
| Calculation of rate constants for thermal back-isomerization | S8-S9 |

## Synthesis of peptoid oligomers

A representative RP-HPLC analytical chromatograph of crude peptoid **1** is shown below. The dominant peak corresponds to the *trans*-azobenzene isomer, and the second-largest peak corresponds to the *cis*-azobenzene isomer.

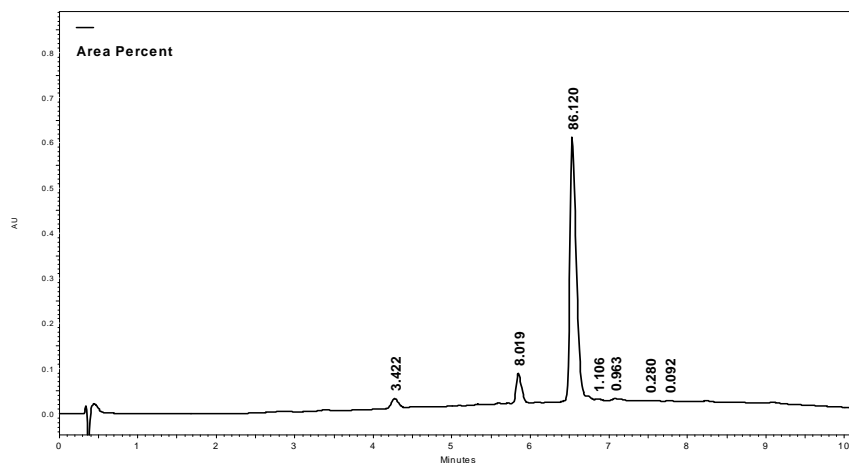

## Structures of peptoid oligomers

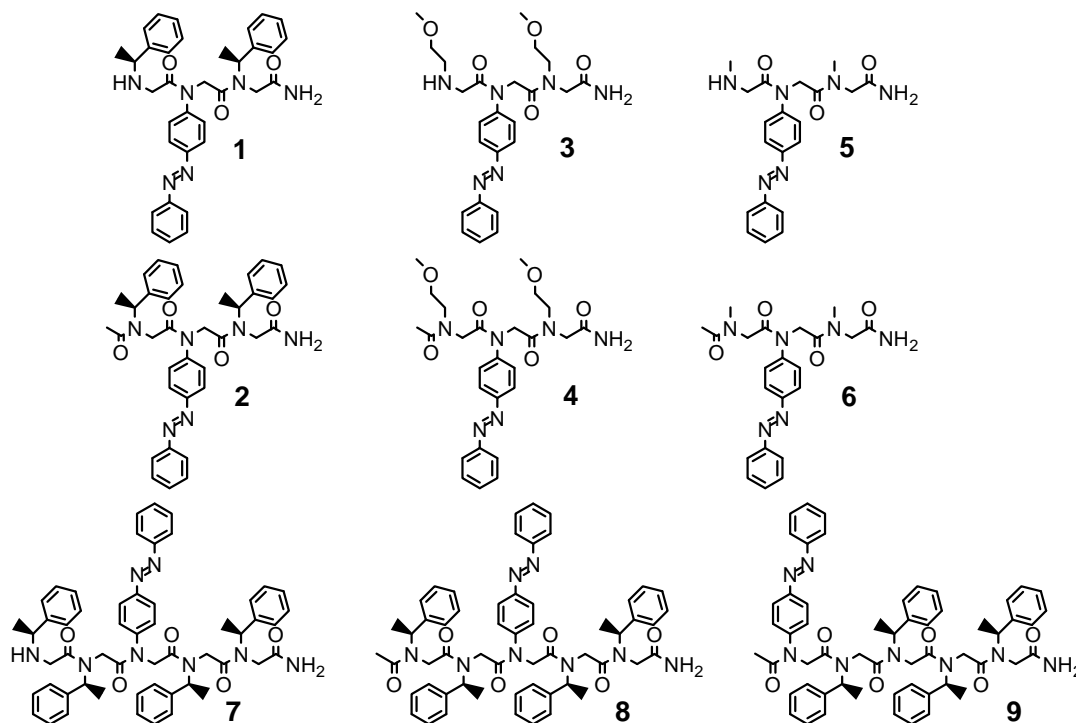

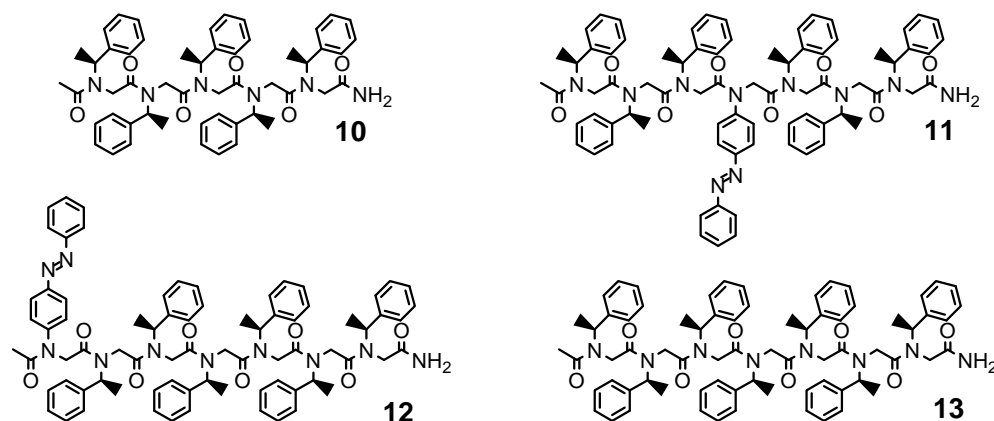

### Characterization of peptoid oligomers

1. Liquid Chromatography/Mass Spectrometry of purified oligomers:

*Nspe* = (S)-N-(1-phenylethyl)glycine, *Nazb* = N-(p-phenylazo-phenyl)glycine, *Nme* = N-(2-methoxy-ethyl)glycine, *Sar* = N-(methyl)glycine or sarcosine

| Compound | Sequence                                             | Formula                 | Calc. m/z | Obs. m/z | Ion      |
|----------|------------------------------------------------------|-------------------------|-----------|----------|----------|
| 1        | <i>Nspe-Nazb-Nspe</i>                                | $C_{34}H_{36}N_6O_3$    | 576.28    | 577.3    | $M+H^+$  |
|          |                                                      |                         |           | 599.3    | $M+Na^+$ |
| 2        | <i>Ac-Nspe-Nazb-Nspe</i>                             | $C_{36}H_{38}N_6O_4$    | 618.30    | 619.1    | $M+H^+$  |
|          |                                                      |                         |           | 641.1    | $M+Na^+$ |
| 3        | <i>Nme-Nazb-Nme</i>                                  | $C_{24}H_{32}N_6O_5$    | 484.24    | 485.2    | $M+H^+$  |
|          |                                                      |                         |           | 507.2    | $M+Na^+$ |
| 4        | <i>Ac-Nme-Nazb-Nme</i>                               | $C_{26}H_{34}N_6O_6$    | 526.25    | 427.0    | $M+H^+$  |
|          |                                                      |                         |           | 549.0    | $M+Na^+$ |
| 5        | <i>Sar-Nazb-Sar</i>                                  | $C_{20}H_{24}N_6O_3$    | 396.19    | 397.0    | $M+H^+$  |
|          |                                                      |                         |           | 399.0    | $M+Na^+$ |
| 6        | <i>Ac-Sar-Nazb-Sar</i>                               | $C_{22}H_{26}N_6O_4$    | 438.20    | 439.0    | $M+H^+$  |
|          |                                                      |                         |           | 461.0    | $M+Na^+$ |
| 7        | $(Nspe)_2-Nazb-(Nspe)_2$                             | $C_{54}H_{58}N_8O_5$    | 898.45    | 899.4    | $M+H^+$  |
|          |                                                      |                         |           | 921.4    | $M+Na^+$ |
| 8        | <i>Ac-(Nspe)<sub>2</sub>-Nazb-(Nspe)<sub>2</sub></i> | $C_{56}H_{60}N_8O_6$    | 940.46    | 941.4    | $M+H^+$  |
|          |                                                      |                         |           | 963.4    | $M+Na^+$ |
| 9        | <i>Ac-Nazb-(Nspe)<sub>4</sub></i>                    | $C_{56}H_{60}N_8O_6$    | 940.46    | 941.4    | $M+H^+$  |
|          |                                                      |                         |           | 963.4    | $M+Na^+$ |
| 10       | <i>Ac-(Nspe)<sub>5</sub></i>                         | $C_{52}H_{60}N_6O_6$    | 864.46    | 865.4    | $M+H^+$  |
|          |                                                      |                         |           | 887.4    | $M+Na^+$ |
| 11       | <i>Ac-(Nspe)<sub>3</sub>-Nazb-(Nspe)<sub>3</sub></i> | $C_{76}H_{82}N_{10}O_8$ | 1262.63   | 1263.7   | $M+H^+$  |
|          |                                                      |                         |           | 1285.8   | $M+Na^+$ |
| 12       | <i>Ac-Nazb-(Nspe)<sub>6</sub></i>                    | $C_{76}H_{82}N_{10}O_8$ | 1262.63   | 1263.7   | $M+H^+$  |
|          |                                                      |                         |           | 1285.7   | $M+Na^+$ |
| 13       | <i>Ac-(Nspe)<sub>7</sub></i>                         | $C_{72}H_{82}N_8O_8$    | 1186.63   | 1187.6   | $M+H^+$  |
|          |                                                      |                         |           | 1209.7   | $M+Na^+$ |

2. Analytical Reverse Phase High Performance Liquid Chromatography of purified oligomers (5-95% acetonitrile in water, 10 minutes, 214 nm):

| Compound | RP-HPLC Chromatograph                                                                | Retention Time |
|----------|--------------------------------------------------------------------------------------|----------------|
| 1        | 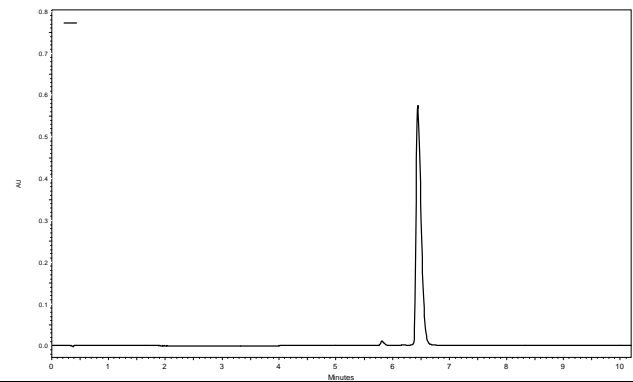   | 6.442 min      |
| 2        |   | 7.092 min      |
| 3        |  | 5.000 min      |
| 4        |  | 5.742 min      |

|          |                                                                                      |           |
|----------|--------------------------------------------------------------------------------------|-----------|
| <b>5</b> | 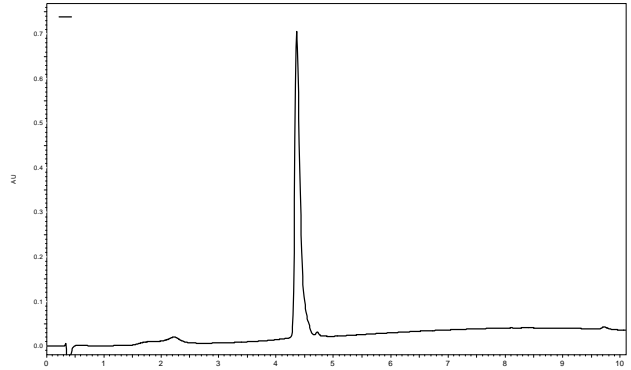   | 4.358 min |
| <b>6</b> |    | 5.308 min |
| <b>7</b> |   | 7.717 min |
| <b>8</b> |  | 8.142 min |
