# Supplementary material for: Photoresponsive peptoid oligomers bearing azobenzene side chains
Source: Royal Society of Chemistry journal article supplement (doi:10.1039/b804802a), 2008-01-01
Supplement: b804802a.pdf [file b804802a.pdf]

Supplementary Information  
for  
**Photoresponsive Peptoid Oligomers  
Bearing Azobenzene Side Chains**

Neel H. Shah and Kent Kirshenbaum\*

*Department of Chemistry, New York University, 100 Washington Square East, New York, NY 10003-6688, USA. E-mail: [kent@nyu.edu](mailto:kent@nyu.edu); Fax: +1 212 260 7905; Tel: +1 212 998 8487*

**TABLE OF CONTENTS:**

|                                                              |       |
|--------------------------------------------------------------|-------|
| Synthesis of peptoid oligomers                               | S2    |
| Structures of peptoid oligomers                              | S2-S3 |
| Characterization of peptoid oligomers                        | S3-S7 |
| Characterization of <b>14</b>                                | S7    |
| Photoisomerization of <b>1</b>                               | S8    |
| Calculation of rate constants for thermal back-isomerization | S8-S9 |

## Synthesis of peptoid oligomers

A representative RP-HPLC analytical chromatograph of crude peptoid **1** is shown below. The dominant peak corresponds to the *trans*-azobenzene isomer, and the second-largest peak corresponds to the *cis*-azobenzene isomer.

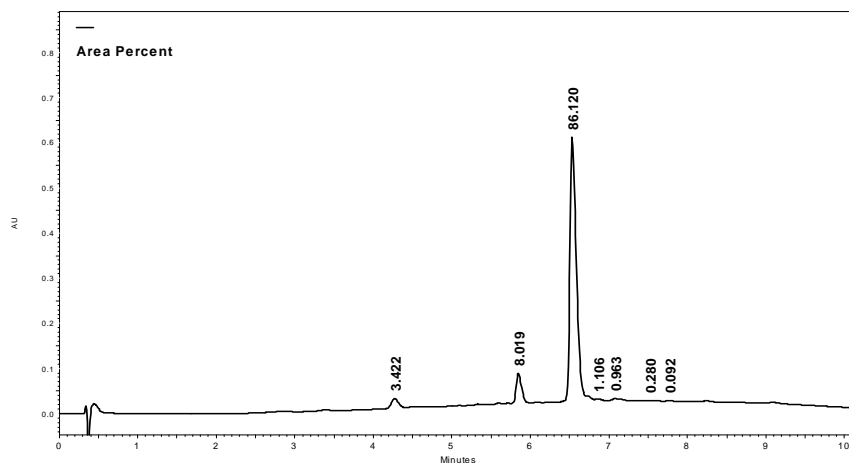

## Structures of peptoid oligomers

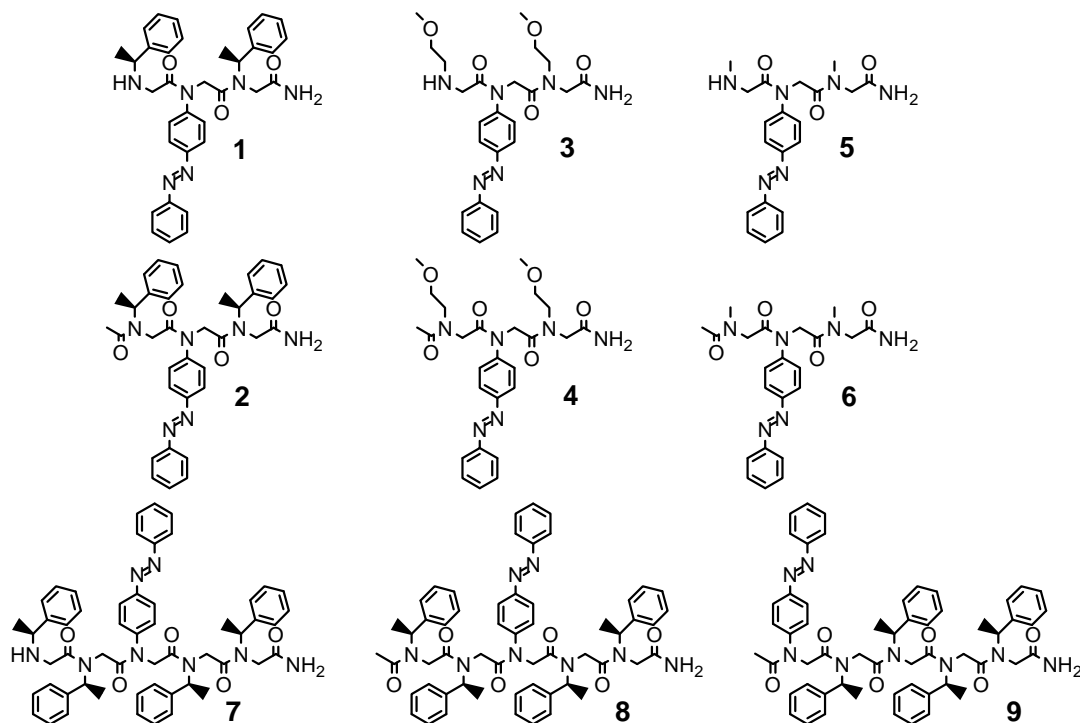

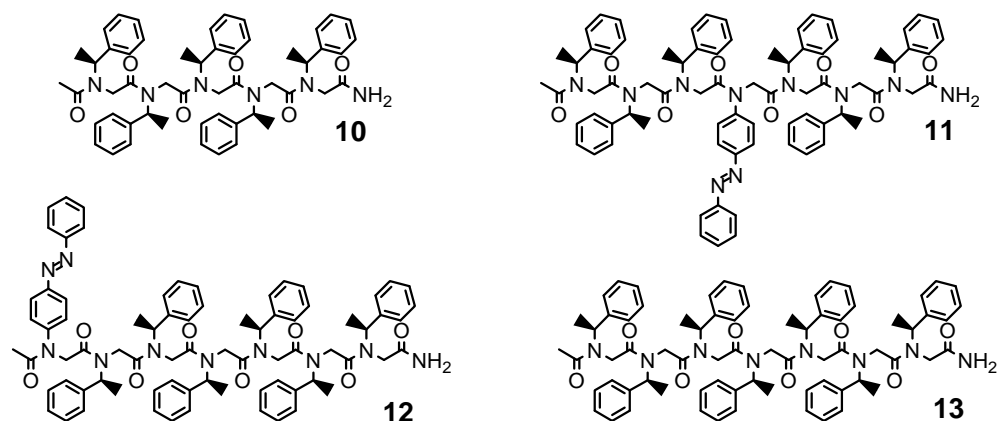

### Characterization of peptoid oligomers

#### 1. Liquid Chromatography/Mass Spectrometry of purified oligomers:

*Nspe* = (S)-N-(1-phenylethyl)glycine, *Nazb* = N-(p-phenylazo-phenyl)glycine, *Nme* = N-(2-methoxy-ethyl)glycine, *Sar* = N-(methyl)glycine or sarcosine

| Compound  | Sequence                                    | Formula                 | Calc. m/z | Obs. m/z | Ion      |
|-----------|---------------------------------------------|-------------------------|-----------|----------|----------|
| <b>1</b>  | <i>Nspe</i> - <i>Nazb</i> - <i>Nspe</i>     | $C_{34}H_{36}N_6O_3$    | 576.28    | 577.3    | $M+H^+$  |
|           |                                             |                         |           | 599.3    | $M+Na^+$ |
| <b>2</b>  | Ac- <i>Nspe</i> - <i>Nazb</i> - <i>Nspe</i> | $C_{36}H_{38}N_6O_4$    | 618.30    | 619.1    | $M+H^+$  |
|           |                                             |                         |           | 641.1    | $M+Na^+$ |
| <b>3</b>  | <i>Nme</i> - <i>Nazb</i> - <i>Nme</i>       | $C_{24}H_{32}N_6O_5$    | 484.24    | 485.2    | $M+H^+$  |
|           |                                             |                         |           | 507.2    | $M+Na^+$ |
| <b>4</b>  | Ac- <i>Nme</i> - <i>Nazb</i> - <i>Nme</i>   | $C_{26}H_{34}N_6O_6$    | 526.25    | 427.0    | $M+H^+$  |
|           |                                             |                         |           | 549.0    | $M+Na^+$ |
| <b>5</b>  | <i>Sar</i> - <i>Nazb</i> - <i>Sar</i>       | $C_{20}H_{24}N_6O_3$    | 396.19    | 397.0    | $M+H^+$  |
|           |                                             |                         |           | 399.0    | $M+Na^+$ |
| <b>6</b>  | Ac- <i>Sar</i> - <i>Nazb</i> - <i>Sar</i>   | $C_{22}H_{26}N_6O_4$    | 438.20    | 439.0    | $M+H^+$  |
|           |                                             |                         |           | 461.0    | $M+Na^+$ |
| <b>7</b>  | $(Nspe)_2$ - <i>Nazb</i> - $(Nspe)_2$       | $C_{54}H_{58}N_8O_5$    | 898.45    | 899.4    | $M+H^+$  |
|           |                                             |                         |           | 921.4    | $M+Na^+$ |
| <b>8</b>  | Ac- $(Nspe)_2$ - <i>Nazb</i> - $(Nspe)_2$   | $C_{56}H_{60}N_8O_6$    | 940.46    | 941.4    | $M+H^+$  |
|           |                                             |                         |           | 963.4    | $M+Na^+$ |
| <b>9</b>  | Ac- <i>Nazb</i> - $(Nspe)_4$                | $C_{56}H_{60}N_8O_6$    | 940.46    | 941.4    | $M+H^+$  |
|           |                                             |                         |           | 963.4    | $M+Na^+$ |
| <b>10</b> | Ac- $(Nspe)_5$                              | $C_{52}H_{60}N_6O_6$    | 864.46    | 865.4    | $M+H^+$  |
|           |                                             |                         |           | 887.4    | $M+Na^+$ |
| <b>11</b> | Ac- $(Nspe)_3$ - <i>Nazb</i> - $(Nspe)_3$   | $C_{76}H_{82}N_{10}O_8$ | 1262.63   | 1263.7   | $M+H^+$  |
|           |                                             |                         |           | 1285.8   | $M+Na^+$ |
| <b>12</b> | Ac- <i>Nazb</i> - $(Nspe)_6$                | $C_{76}H_{82}N_{10}O_8$ | 1262.63   | 1263.7   | $M+H^+$  |
|           |                                             |                         |           | 1285.7   | $M+Na^+$ |
| <b>13</b> | Ac- $(Nspe)_7$                              | $C_{72}H_{82}N_8O_8$    | 1186.63   | 1187.6   | $M+H^+$  |
|           |                                             |                         |           | 1209.7   | $M+Na^+$ |

2. Analytical Reverse Phase High Performance Liquid Chromatography of purified oligomers (5-95% acetonitrile in water, 10 minutes, 214 nm):

| Compound | RP-HPLC Chromatograph                                                                | Retention Time |
|----------|--------------------------------------------------------------------------------------|----------------|
| 1        | 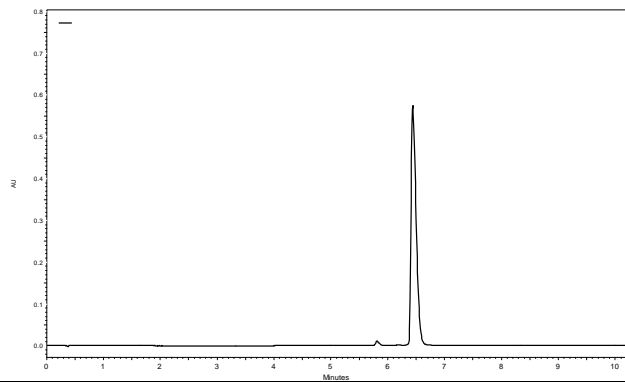   | 6.442 min      |
| 2        |   | 7.092 min      |
| 3        |  | 5.000 min      |
| 4        |  | 5.742 min      |

|   |                                                                                      |           |
|---|--------------------------------------------------------------------------------------|-----------|
| 5 | 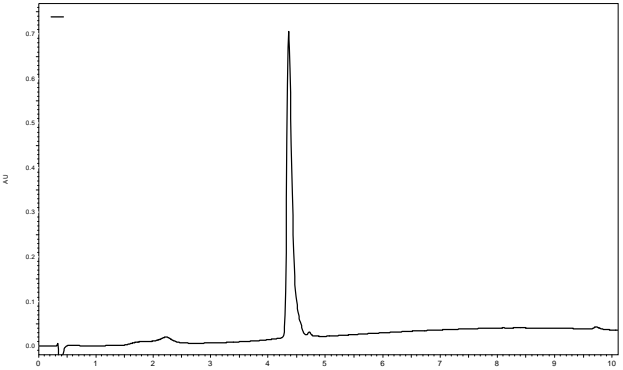   | 4.358 min |
| 6 |    | 5.308 min |
| 7 |   | 7.717 min |
| 8 |  | 8.142 min |

|                  |                                                                                      |                  |
|------------------|--------------------------------------------------------------------------------------|------------------|
| <p><b>9</b></p>  | 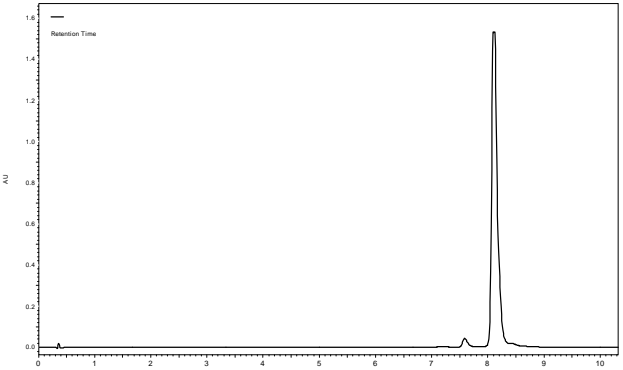   | <p>8.092 min</p> |
| <p><b>10</b></p> |    | <p>7.525 min</p> |
| <p><b>11</b></p> |   | <p>8.842 min</p> |
| <p><b>12</b></p> |  | <p>8.917 min</p> |

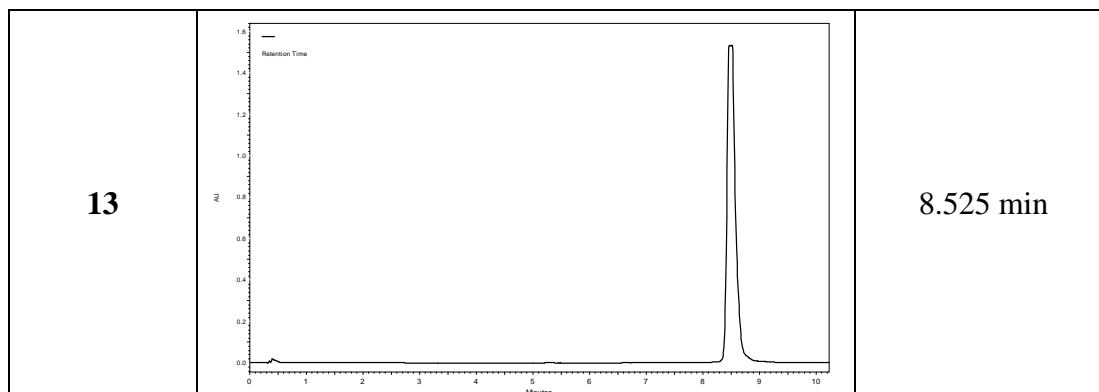

Based on LC/MS data, RP-HPLC chromatographs containing two dominant peaks are believed to be the *trans*- and *cis*-azobenzene isomers of the same oligomer.

### Characterization of *N*-methyl-4-phenylazo-acetanilide (14)

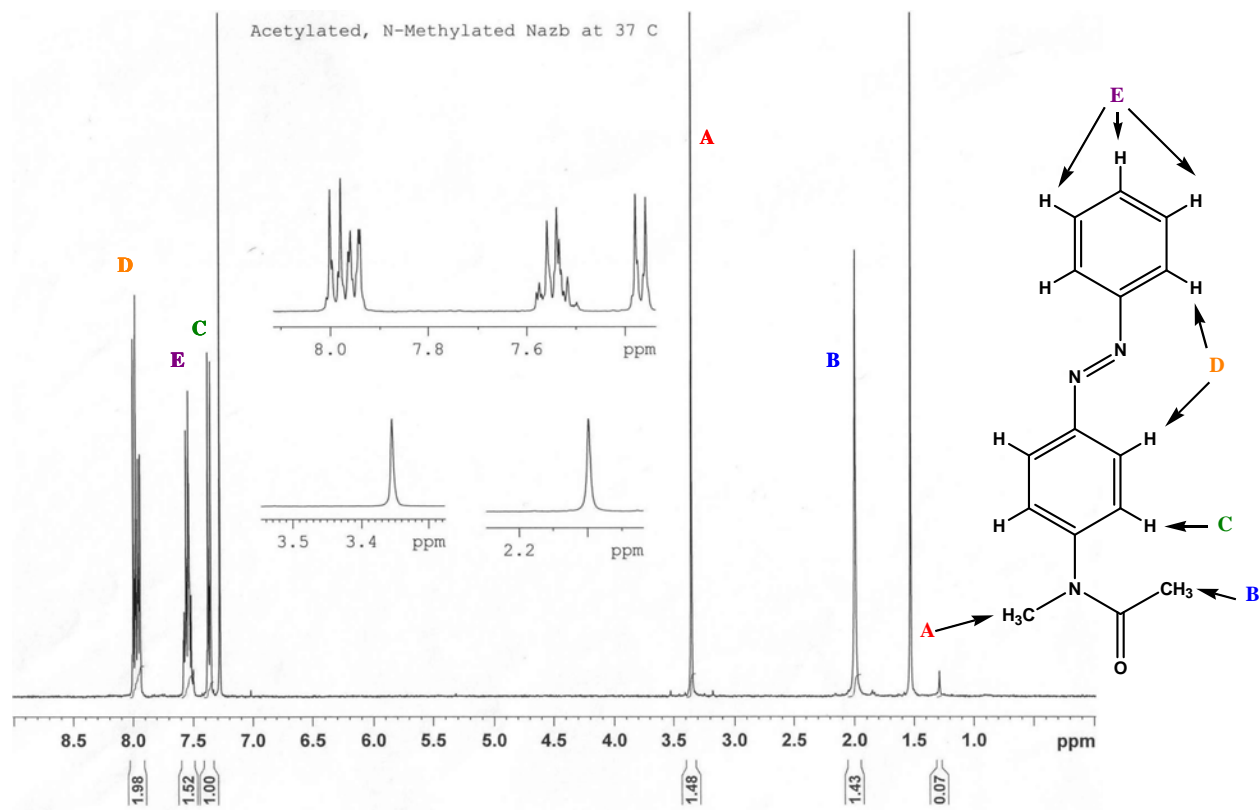

**Trans- to cis-azobenzene Photoisomerization of oligomer 1 monitored via HPLC at 273 nm**  
 Before irradiation (below) after irradiation (above)

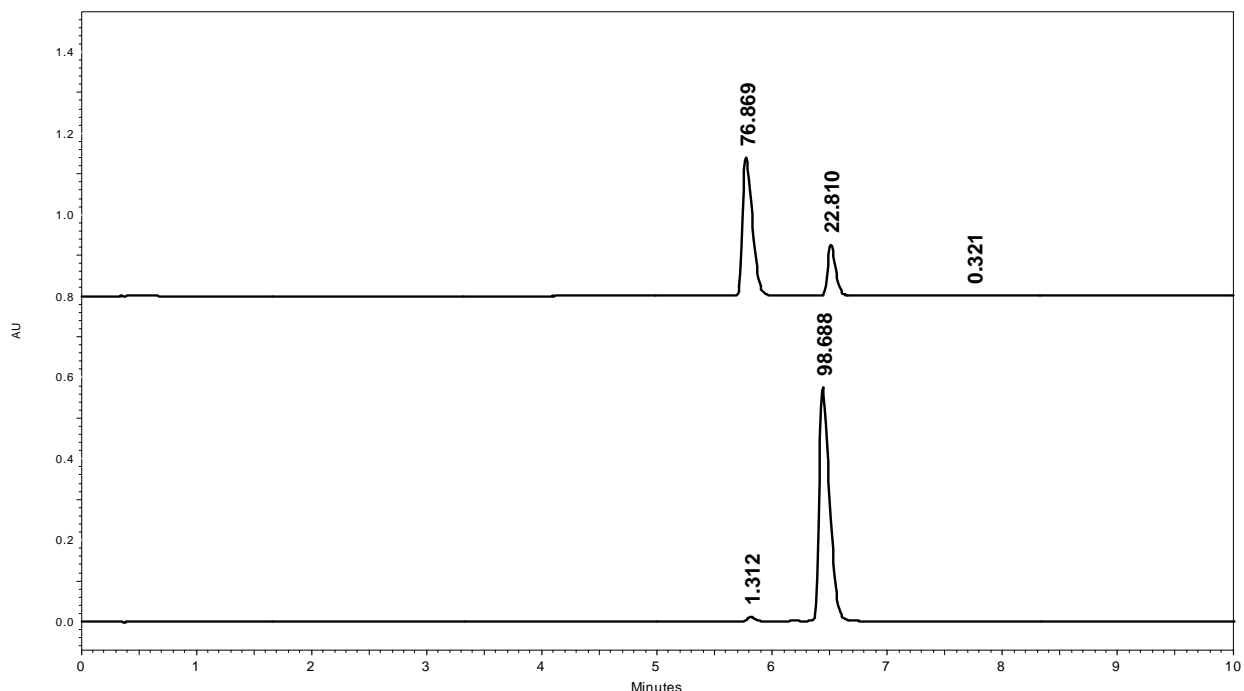

**Calculation of rate constants for cis- to trans- thermal isomerization**

The approximate rates of thermal back-isomerization for each compound were obtained using absorbance data collected at 325 nm as described above. First, it was assumed that since all samples were purified and stored in the dark, each compound existed exclusively in the *trans*-azobenzene form prior to any irradiation. Thus, before irradiation (at time *b*):

$$A_b = \varepsilon_{trans} [trans](1cm) \rightarrow \varepsilon_{trans} = \frac{A_b}{[trans]_b(1cm)}$$

After irradiation the absorbance  $A_t$  at time *t* can be described as follows:

$$A_t = A_{cis} + A_{trans} = \varepsilon_{cis} [cis]_t(1cm) + \varepsilon_{trans} [trans]_t(1cm)$$

$$A_t = \varepsilon_{cis} [cis]_t(1cm) + \frac{A_b}{[trans]_b} [trans]_t$$

Since, at all times,  $[total] = [trans]_b = [cis]_t + [trans]_t$

$$A_t = \varepsilon_{cis} [cis]_t(1cm) + \frac{A_b}{[trans]_b} ([trans]_b - [cis]_t)$$

$$A_t = \varepsilon_{cis} [cis]_t(1cm) + A_b - \frac{A_b}{[trans]_b} [cis]_t$$

$$A_t = [cis]_t \left( \varepsilon_{cis}(1cm) - \frac{A_b}{[trans]_b} \right) + A_b$$



Thus, the following relationship can be found:

$$\frac{[cis]_t}{[cis]_0} = \frac{A_t - A_b}{A_0 - A_b}$$

This value was plotted for each compound as a function of time, and fitted to an exponential regression ( $R^2 > 0.98$  in every case). From this regression, the rate constant and half-life were readily calculated using the first order rate-law.
